# Supplementary material for: Improved high-voltage cycling stability of single-crystalline LiNi0.8Co0.1Mn0.1O2 cathode by tantalum doping
Source: Royal Society of Chemistry journal article supplement (doi:10.1039/d4ta04307c), 2024-01-01
Supplement: d4ta04307c1.pdf [file d4ta04307c1.pdf]

## **Improved high-voltage cycling stability of single-crystalline $\text{LiNi}_{0.8}\text{Co}_{0.1}\text{Mn}_{0.1}\text{O}_2$ cathode by tantalum doping**

**Bokai Cao<sup>a,b,c</sup>, Xu hao Liu<sup>c</sup>, Hai-Tao Fang<sup>\*b</sup>, De Li<sup>\*c</sup> and Yong Chen<sup>\*a,c</sup>**

<sup>a</sup> Guangdong Key Laboratory for Hydrogen Energy Technologies, School of Materials Science and Hydrogen Energy, Foshan University, Foshan 528000, China.

<sup>b</sup> School of Materials Science and Engineering, Harbin Institute of Technology, 92 West Dazhi Street, Harbin 150001, China.

<sup>c</sup> State Key Laboratory of Marine Resource Utilization in South China Sea, Hainan Provincial Key Laboratory of Research on Utilization of Si-Zr-Ti Resources, Hainan University, 58 Renmin Road, Haikou 570228, China.

### **Corresponding authors**

\*E-mail: [htfang@hit.edu.cn](mailto:htfang@hit.edu.cn) (Hai-Tao Fang).

\*E-mail: [lidenju@sina.com](mailto:lidenju@sina.com) (De Li).

\*E-mail: [ychen2002@163.com](mailto:ychen2002@163.com) (Yong Chen).

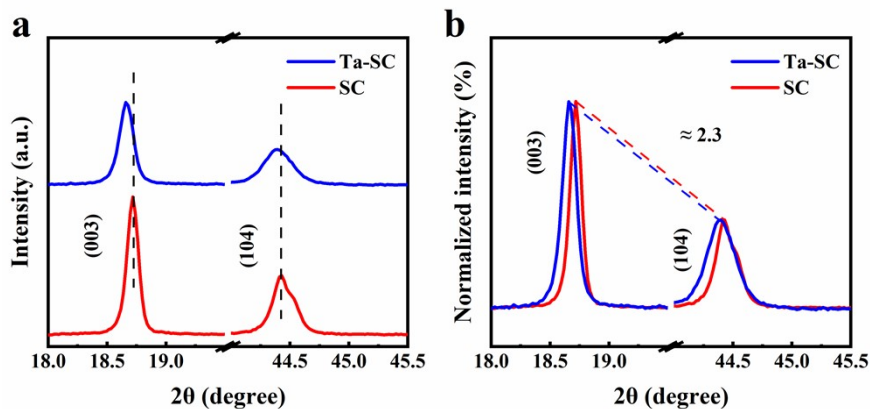

Figure S1. (a) Magnified XRD patterns of (003) and (104) peaks. (b) Enlarged the selection range with the normalized intensity.

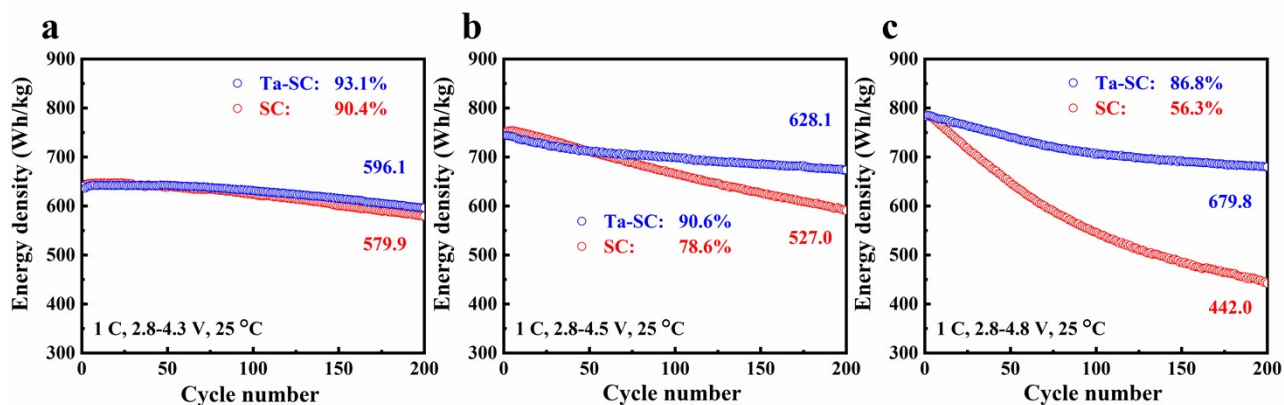

Figure S2. Energy densities of SC and Ta-SC cathodes when cycled between (a) 2.8-4.3 V, (b) 2.8-4.7 V and (c) 2.8-4.8 V at 1 C, 25 °C.

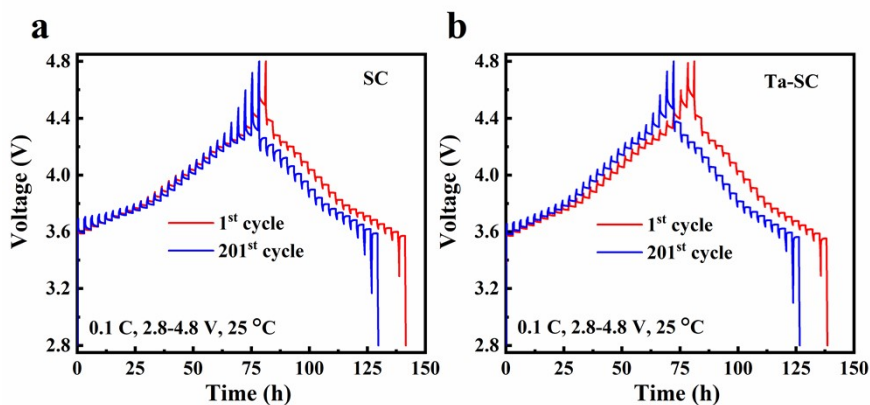

Figure S3. GITT profiles of (a) SC and (b) Ta-SC cathodes at the 1<sup>st</sup> and 201<sup>st</sup> cycle.

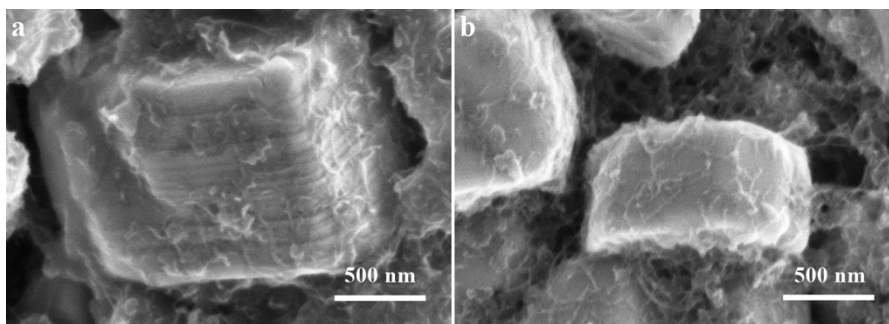

Figure S4. SEM images of (a) SC and (b) Ta-SC cathodes after 200 cycles between 2.8-4.8 V.

**Table 1.** ICP results of SC and Ta-SC powders.

| Sample | Chemical composition (at. %) |       |      |      |
|--------|------------------------------|-------|------|------|
|        | Ni                           | Co    | Mn   | Ta   |
| SC     | 80.13                        | 10.00 | 9.87 | -    |
| Ta-SC  | 79.13                        | 10.02 | 9.90 | 0.95 |
